# Supplementary material for: A Comparative Structure/Function Analysis of Two Type IV Pilin DNA Receptors Defines a Novel Mode of DNA Binding
Source: PubMed Central journal article supplement (PMC4906244; doi:10.1016/j.str.2016.04.001), 2016-06-07
Supplement: mmc1.pdf [file mmc1.pdf]

**Structure, Volume 24**

**Supplemental Information**

**A Comparative Structure/Function Analysis of Two  
Type IV Pilin DNA Receptors Defines  
a Novel Mode of DNA Binding**

**Jamie-Lee Berry, Yingqi Xu, Philip N. Ward, Susan M. Lea, Stephen J. Matthews, and Vladimir Pelicic**

**A comparative structure/function analysis of two type IV pilin DNA receptors defines a novel mode of DNA-binding**

Jamie-Lee Berry<sup>1</sup>, Yingqi Xu<sup>2</sup>, Philip N. Ward<sup>3</sup>, Susan M. Lea<sup>3</sup>, Stephen J. Matthews<sup>2,\*</sup>  
and Vladimir Pelicic<sup>1,\*</sup>

<sup>1</sup>MRC Centre for Molecular Bacteriology and Infection, Imperial College London,  
London SW7 2AZ, United Kingdom

<sup>2</sup>Centre for Structural Biology, Imperial College London, London SW7 2AZ, United  
Kingdom

<sup>3</sup>Sir William Dunn School of Pathology, University of Oxford, Oxford OX1 3RE, United  
Kingdom

\*Correspondence: [s.j.matthews@imperial.ac.uk](mailto:s.j.matthews@imperial.ac.uk) (S.J.M.), [v.pelicic@imperial.ac.uk](mailto:v.pelicic@imperial.ac.uk)  
(V.P.)

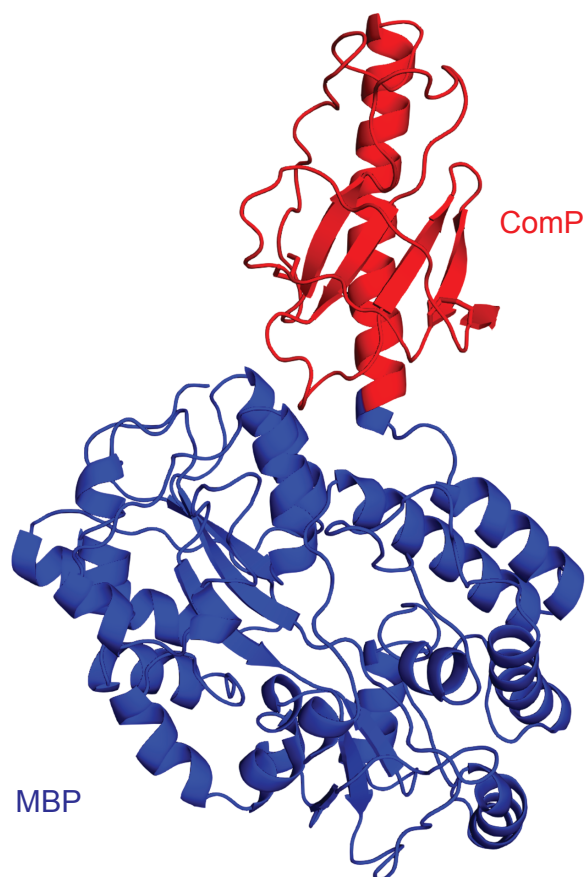

**Figure S1, related to Figure 3. Full 3D structure of the MBP-ComP fusion protein.** The crystal structure is shown as a cartoon drawing. The ComP moiety is highlighted in red, while the MBP moiety is highlighted in blue.

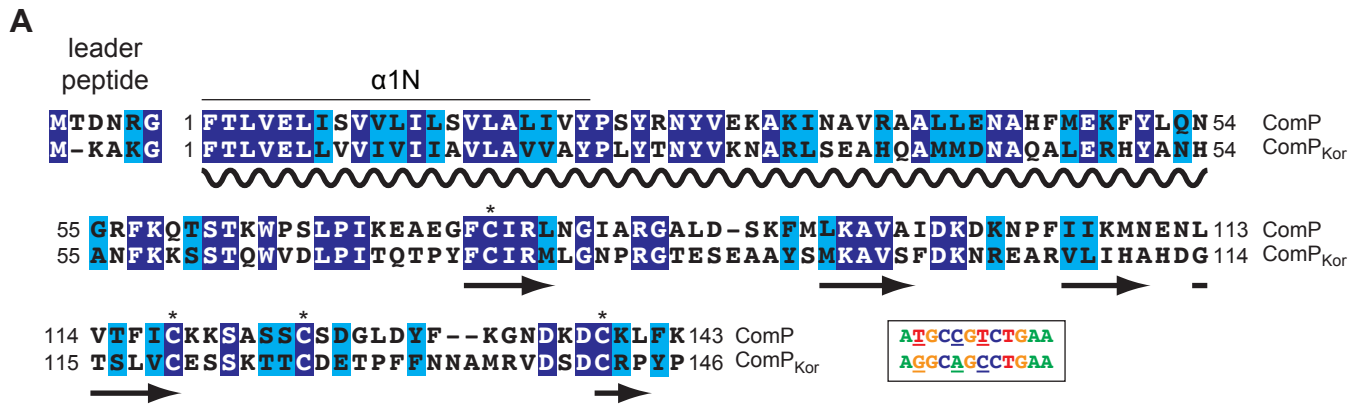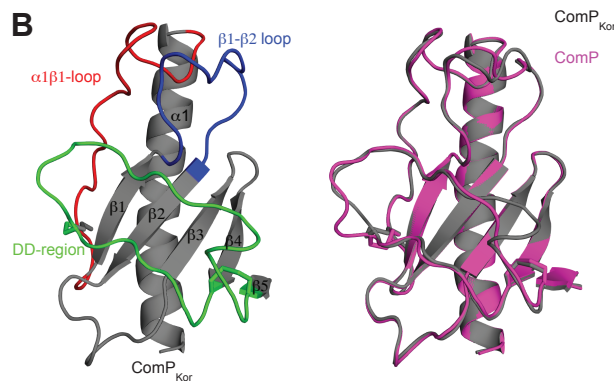

**Figure S2, related to Figures 3 and 4. Homology modelling of the structure of the ComP<sub>Kor</sub> ortholog from *K. oralis*.** (A) Sequence alignment of ComP<sub>Kor</sub> with ComP from *N. meningitidis* 8013, produced using Clustal Omega. Amino acids were shaded in dark blue (when identical), in light blue (when highly similar) or non-shaded (when non-conserved). Relevant structural and functional features have been highlighted. The four Cys residues that form two crucial disulfide bonds are identified by \*. The inset represents a sequence alignment of DUS and the DUS variant found in *K. oralis*. These motifs differ by three base, which have been underlined. (B) Cartoon drawing representation of the homology model of ComP<sub>Kor</sub> and of its superposition with the ComP crystal structure.

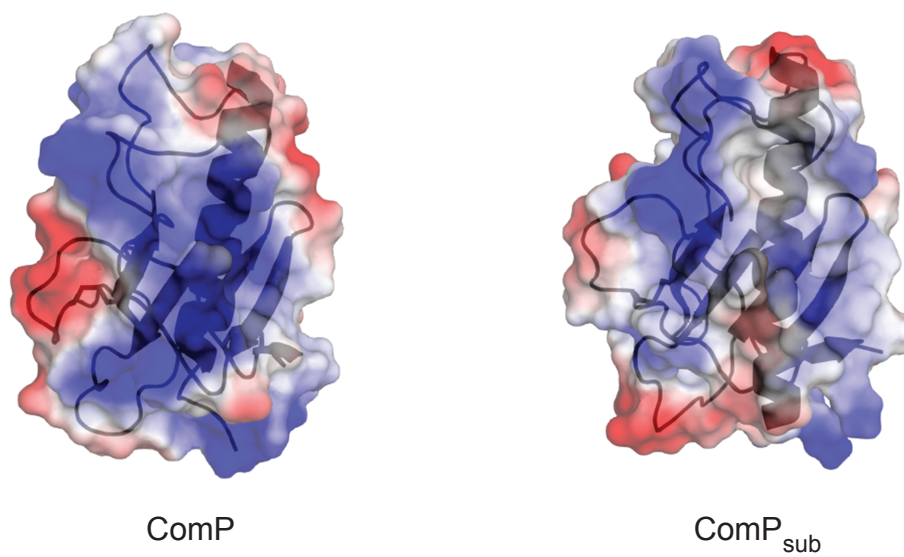

**Figure S3, related to Figures 3 and 4. Surface charge representation of the ComP and ComP<sub>sub</sub> structures.** Positively charged residues are represented in blue, negatively charged residues in red, while neutral residues are not coloured.

**Table S1, related to Figures 3 and 4. Structural data collection and refinement parameters.**

|                                           |                                  |       |
|-------------------------------------------|----------------------------------|-------|
| <b>MBP-Comp</b>                           |                                  |       |
| Resolution range (Å)                      | 58.05-1.43 (1.47-1.43)           |       |
| Space group                               | $P2_12_12_1$                     |       |
| Unit cell dimensions                      | 63.57, 68.44, 109.58; 90, 90, 90 |       |
| Total observations                        | 415,797 (28,880)                 |       |
| Total unique                              | 88,446 (6,445)                   |       |
| Multiplicity                              | 4.7 (4.5)                        |       |
| Completeness (%)                          | 99.5 (99.2)                      |       |
| $I/\sigma(I)$                             | 15 (1.2)                         |       |
| Wilson B factor                           |                                  | 21.3  |
| $R_{\text{merge}}$                        | 0.039 (1.096)                    |       |
| $R_{\text{meas}}$                         | 0.049 (1.384)                    |       |
| $R_{\text{work}}$                         |                                  | 0.16  |
| $R_{\text{free}}$                         |                                  | 0.19  |
| Ramachandran favoured (%)                 |                                  | 97.2  |
| Ramachandran outliers (%)                 |                                  | 0     |
| Average B factor                          |                                  | 29    |
| <b>His<sub>6</sub>-Comp<sub>sub</sub></b> |                                  |       |
| Number of distance restraints             |                                  | 2,017 |
| intra-residual                            |                                  | 744   |
| sequential                                |                                  | 445   |
| medium range                              |                                  | 273   |
| long range                                |                                  | 555   |
| NOE violations >0.5 Å                     |                                  | 1     |
| Dihedral violations >5°                   |                                  | 0     |
| Ramachandran favoured (%)                 |                                  | 75.5  |
| Ramachandran allowed (%)                  |                                  | 20.6  |
| Ramachandran generously allowed (%)       |                                  | 3.9   |
| Ramachandran disallowed (%)               |                                  | 0     |

**Table S2, related to the Experimental procedures. Primers used in this study.**

| <b>Name</b>                         | <b>Sequence<sup>a</sup></b>                             |
|-------------------------------------|---------------------------------------------------------|
| <b>Cloning</b>                      |                                                         |
| <i>optcomP</i> -F                   | <b>gggaattc</b> GAAAAAGCCAAAATTAACGCAGTT                |
| <i>optcomP</i> -R                   | <b>ggaagctt</b> TTATTTAAACAGTTTGCAGTCTTTG               |
| <i>comP</i> <sub>sub</sub> -pMalF   | <b>gggaattc</b> CGCTCGGCCAACCTGCGTG                     |
| <i>comP</i> <sub>sub</sub> -pMalR   | <b>ggaagctt</b> TCACCCCGTAAAAGGCCGA                     |
| <i>hiscomP</i> <sub>sub</sub> -pETF | <b>ggccatgg</b> atcatcatcatcatcatcatCGCTCGGCCAACCTGCGTG |
| <i>hiscomP</i> <sub>sub</sub> -pETR | <b>ccggatcc</b> TCACCCCGTAAAAGGCCGA                     |
| <b>DNA-binding assay (EMSA/SPR)</b> |                                                         |
| DUS <sub>var1</sub> 1 <sup>b</sup>  | tgacc <b>AGGCCGTCTGAA</b> caaac                         |
| DUS <sub>var1</sub> 2               | gtttg <b>TTCAGACGGCCT</b> ggtca                         |
| SUD1 <sup>b</sup>                   | tgacc <b>ACGACTTATAAT</b> caaac                         |
| SUD2                                | gtttg <b>ATTATAAGTCGT</b> ggtca                         |
| SDU1 <sup>b</sup>                   | tgacc <b>AAGGCCTGTCAT</b> caaac                         |
| SDU2                                | gtttg <b>ATGACAGGCCTT</b> ggtca                         |
| <b>NMR titration</b>                |                                                         |
| DUS <sub>var1</sub> 1bis            | <b>cAGGCCGTCTGAA</b> c                                  |
| DUS <sub>var1</sub> 2bis            | <b>gTTCAGACGGCCT</b> g                                  |

<sup>a</sup>Overhangs are in lower case, with restriction sites in bold.

<sup>b</sup>When indicated, these primers were 5'-labelled with biotin.
